# Supplementary material for: Association of PD-L1 Expression on Tumor and Immune Cells with Survival in Recurrent or Metastatic Head and Neck Squamous Cell Carcinoma and Assay Validation
Source: PubMed Central journal article supplement (PMC9973403; doi:10.1158/2767-9764.crc-21-0032), 2022-01-20
Supplement: crc-21-0032-s01.pdf [file crc-21-0032-s01.pdf]

**Supplementary Fig. S1.** Assessment of the correlation between TC and IC staining in samples from durvalumab-treated patients.

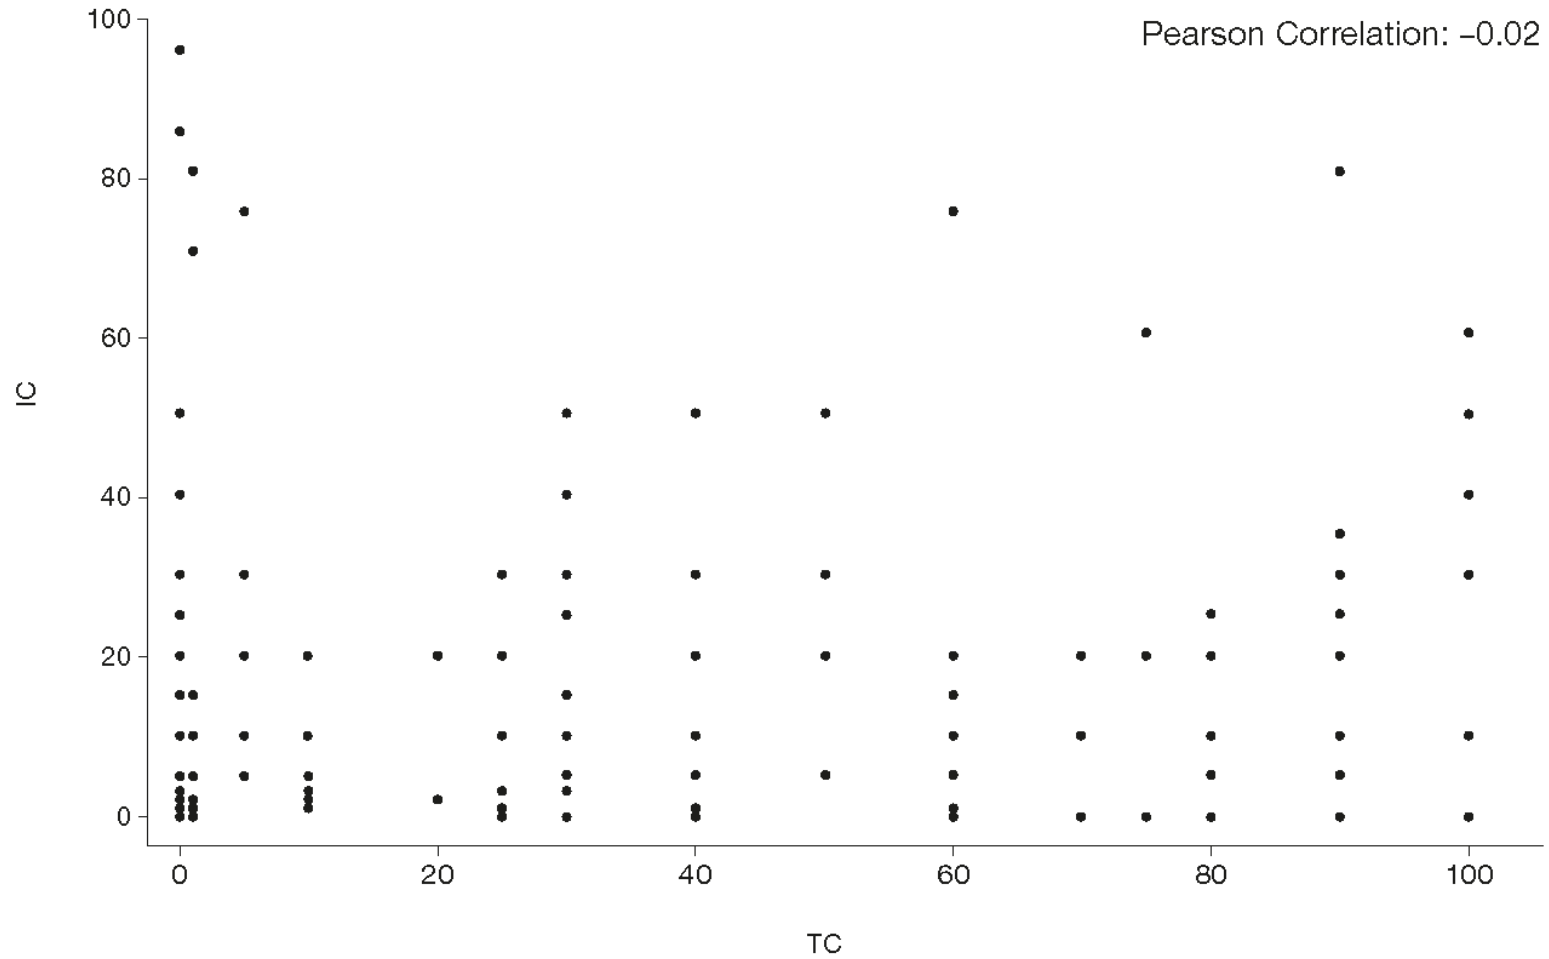

IC, immune cell; TC, tumor cell.

**Supplementary Fig. S2.** Kaplan–Meier plots of OS in durvalumab-treated patients at a range of PD-L1 (A) TC cutpoints and (B) IC cutpoints. These plots are based on the original PD-L1 scoring data with only 18 months of survival follow-up.

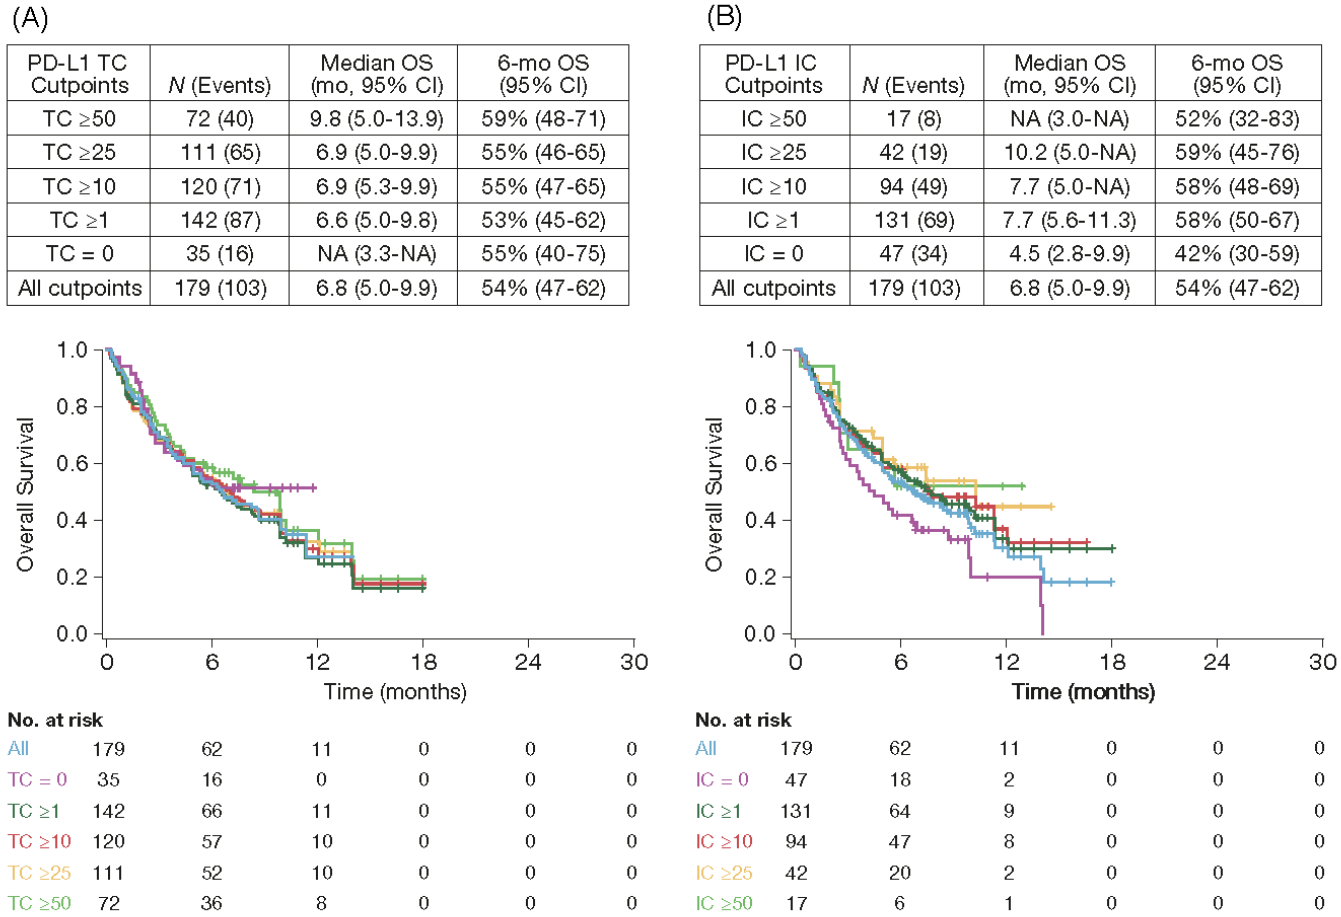

IC, immune cell; OS, overall survival; PD-L1, programmed cell death ligand-1; TC, tumor cell.

**Supplementary Fig. S3.** Kaplan–Meier plots of PFS in durvalumab-treated patients using a range of PD-L1 (A) TC cutpoints and (B) IC cutpoints. These plots are based on the original PD-L1 scoring data with only 18 months of survival follow-up.

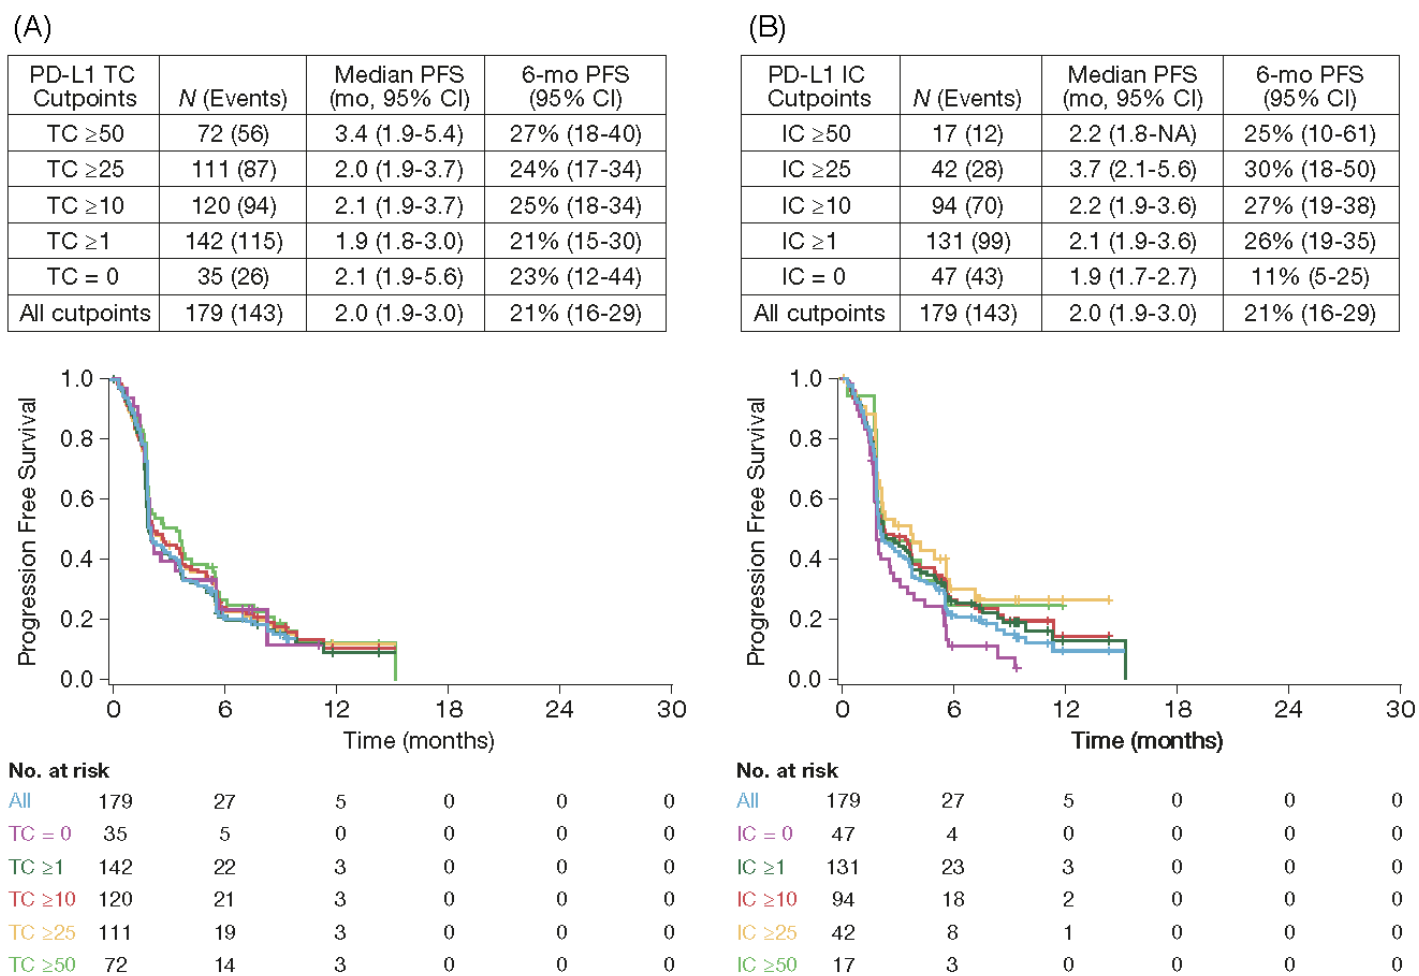

IC, immune cell; PD-L1, programmed cell death ligand-1; PFS, progression-free survival; TC, tumor cell.

**Supplementary Fig. S4.** Bootstrapped OS HR for HAWK and CONDOR combined data for durvalumab monotherapy ( $n = 190$  patients). Data shows overall survival HR [BM+ vs. BM-] unadjusted Cox PH (with Ties handling method=Effron) highlighting optimal cutpoint of  $TC \geq 50$  or  $IC \geq 25\%$  with the lowest HR.

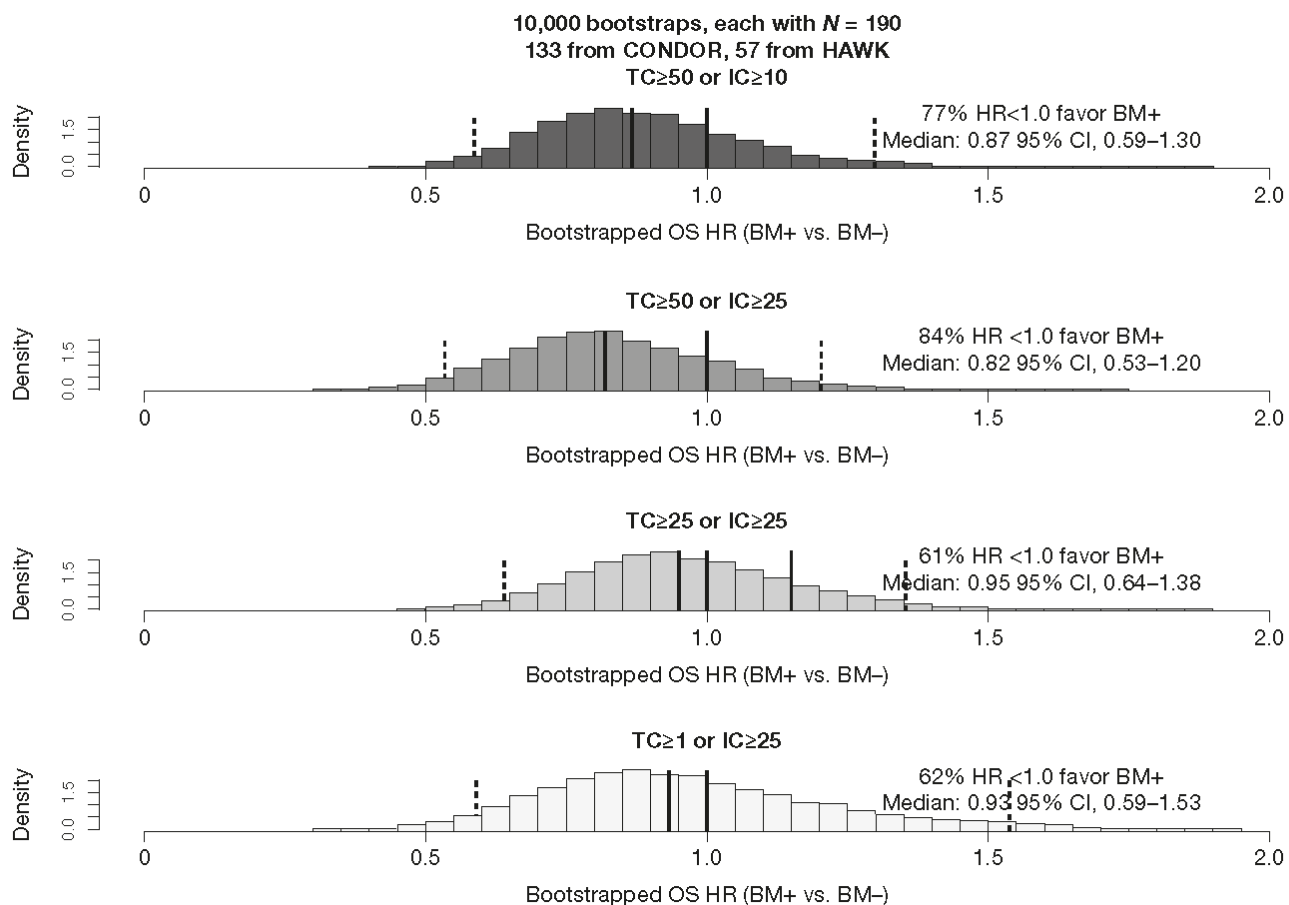

BM, biomarker; CI, confidence interval; HR, hazard ratio; IC, immune cell; OS, overall survival; TC, tumor cell.

**Supplementary Fig. S5.** Kaplan–Meier plots of (A) OS and (B) PFS using the TC50%/IC25% algorithm, based on updated data cutoffs for CONDOR (2018-08-27) and HAWK (2018-06-21).

(A)

| Combined algorithm | <i>N</i> (Events) | Median OS (mo, 95% CI) | 6-mo OS (95% CI) | Unadjusted HR (95% CI) | Adjusted HR (95% CI) |
|--------------------|-------------------|------------------------|------------------|------------------------|----------------------|
| TC ≥50/IC ≥25      | 99 (80)           | 9.8 (5.0-11.5)         | 58% (47-67)      | 0.68 (0.52-0.90)       | 0.71 (0.53-1.04)     |
| TC <50/IC <25      | 80 (71)           | 5.5 (3.8-8.3)          | 49% (37-59)      |                        |                      |

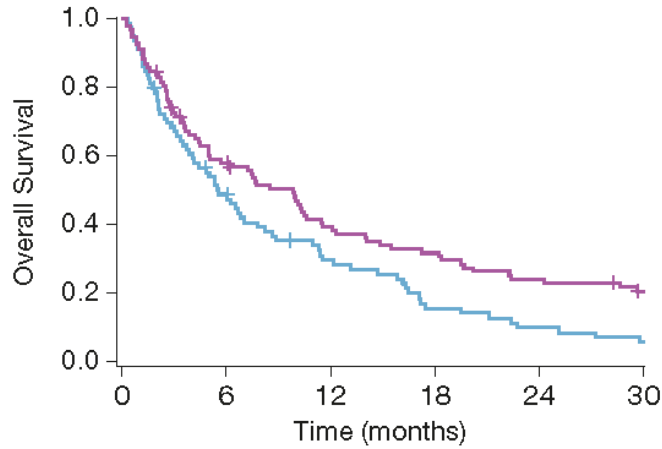

**No. at risk**

|               |    |    |    |    |    |    |
|---------------|----|----|----|----|----|----|
| TC ≥50/IC ≥25 | 99 | 55 | 36 | 29 | 22 | 16 |
| TC <50/IC <25 | 80 | 37 | 21 | 11 | 7  | 4  |

(B)

| Combined algorithm | <i>N</i> (Events) | Median PFS (mo, 95% CI) | 6-mo PFS (95% CI) | Unadjusted HR (95% CI) | Adjusted HR (95% CI) |
|--------------------|-------------------|-------------------------|-------------------|------------------------|----------------------|
| TC ≥50/IC ≥25      | 99 (89)           | 2.8 (2.0-5.0)           | 18% (11-27)       | 0.68 (0.52-0.88)       | 0.69 (0.52-0.91)     |
| TC <50/IC <25      | 80 (74)           | 1.9 (1.8-2.1)           | 9% (4-19)         |                        |                      |

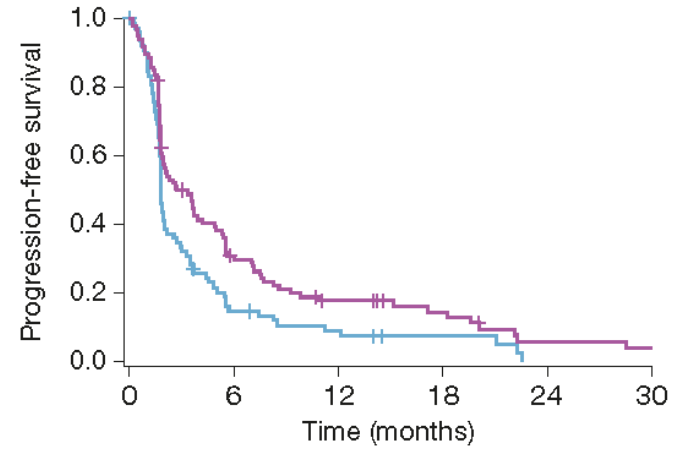

**No. at risk**

|               |    |    |    |   |   |   |
|---------------|----|----|----|---|---|---|
| TC ≥50/IC ≥25 | 99 | 28 | 14 | 9 | 3 | 2 |
| TC <50/IC <25 | 80 | 11 | 6  | 3 | 0 | 0 |

CI, confidence interval; HR, hazard ratio; IC, immune cell; OS, overall survival; PFS, progression-free survival; TC, tumor cell.

**Supplementary Table S1.** TC PD-L1 expression levels according to HAWK and CONDOR categories.

| CONDOR      |              | HAWK        |              |
|-------------|--------------|-------------|--------------|
| Scoring bin | Bin contents | Scoring bin | Bin contents |
| <1%         | <1%          | 25%         | 25%          |
| ≥1%         | 1–4%         | 30%         | 26–34%       |
| ≥5%         | 5–9%         | 40%         | 35–44%       |
| ≥10%        | 10–19%       | 50%         | 45–54%       |
| ≥20%        | 20–24%       | 60%         | 55–64%       |
|             |              | 70%         | 65–74%       |
|             |              | 75%         | 75%          |
|             |              | 80%         | 76–84%       |
|             |              | 90%         | 85–94%       |
|             |              | 100%        | 95–100%      |

PD-L1, programmed cell death ligand-1; TC, tumor cell.

**Supplementary Table S2.** VENTANA PD-L1 (SP263) assay scoring algorithm for HNSCC.

| <b>VENTANA PD-L1 (SP263) assay scoring algorithm for HNSCC</b>                                                                                                                                                                                                                                                                                                                                                 |                                                                                                                                                                                                                                            |
|----------------------------------------------------------------------------------------------------------------------------------------------------------------------------------------------------------------------------------------------------------------------------------------------------------------------------------------------------------------------------------------------------------------|--------------------------------------------------------------------------------------------------------------------------------------------------------------------------------------------------------------------------------------------|
| <b>PD-L1 interpretation</b>                                                                                                                                                                                                                                                                                                                                                                                    | <b>Staining description</b>                                                                                                                                                                                                                |
| PD-L1 status is determined by the percentage of TCs with any membrane staining above background or by the percentage of tumor-associated immune cells (ICs) with staining (IC+) at any intensity above background. The percent of tumor area occupied by any tumor-associated ICs (ICs present; ICP) is used to determine IC+, which is the percent area of ICP exhibiting PD-L1 positive immune cell staining |                                                                                                                                                                                                                                            |
| High status                                                                                                                                                                                                                                                                                                                                                                                                    | PD-L1 status is considered high if any of the following are met: <ul style="list-style-type: none"> <li>▪ ≥50% of TCs exhibit membrane staining; or,</li> <li>▪ ICP &gt;1% and IC+ ≥25%; or,</li> <li>▪ ICP = 1% and IC+ = 100%</li> </ul> |
| Low/negative status                                                                                                                                                                                                                                                                                                                                                                                            | PD-L1 status is considered low/negative if: <ul style="list-style-type: none"> <li>▪ None of the criteria for PD-L1-high status are met</li> </ul>                                                                                         |

IC, immune cell; ICP, ICs present; PD-L1, programmed cell death ligand-1; HNSCC, head and neck squamous cell carcinoma; TC, tumor cell.

**Supplementary Table S3.** Design verification study results and analytical validation (interlaboratory reproducibility) at the TC≥50%/IC≥25% cutpoint.

| Study outline                   | Design                                                                                                                                                      | Results                                                                                                                                                              |                                                                                                       |
|---------------------------------|-------------------------------------------------------------------------------------------------------------------------------------------------------------|----------------------------------------------------------------------------------------------------------------------------------------------------------------------|-------------------------------------------------------------------------------------------------------|
| Reader precision                | Cohort previously screened for PD-L1 status; consisted of 100 tissue samples (50 PD-L1-high and 50 PD-L1-low/negative)                                      | Between reader, % (95% CI):<br>APA 98.0% (95.4–100.0)<br>ANA 98.0% (95.4–100.0)<br>OPA 98.0% (95.3–100.0)                                                            | Within reader, % (95% CI):<br>APA 98.7% (97.1–99.7)<br>ANA 98.7% (97.1–99.7)<br>OPA 98.7% (97.3–99.7) |
| Interlaboratory reproducibility | Tested in three laboratories with two readers at each site for 5 non-consecutive days; 28 tissue samples enrolled (14 PD-L1-high and 14 PD-L1-low/negative) | Overall, % (95% CI)<br>PPA 99.0% (97.9–100.0)<br>NPA 98.1% (98.0–98.1)<br>OPA 98.6% (98.0–99.0)                                                                      |                                                                                                       |
| Cut-slide stability             | Four tissue samples sectioned at 4 µm and stored at 2–8°C and 30°C for up to 13 months                                                                      | Staining results at different storage temperatures and time points up to Month 9 were consistent with results achieved on Day 0. The recommended dating is 7 months. |                                                                                                       |
| Tissue thickness                | Four tissue samples sectioned at various thickness (2, 3, 4, 5, 6, 7 µm)                                                                                    | Demonstrated appropriate antibody staining across all thickness tested. The recommend tissue thickness is 4–5 µm.                                                    |                                                                                                       |

ANA, average negative agreement; APA, average positive agreement; CI, confidence interval; IC, immune cell; NPA, negative percent agreement; OPA, overall percent agreement; PD-L1, programmed cell death ligand-1; PPA, positive percent agreement; TC, tumor cell.
